# Supplementary material
Source: PubMed Central journal article supplement (PMC3947471)
Supplement: NIHMS533058-supplement-Supp_Figure_S1.pdf [file NIHMS533058-supplement-Supp_Figure_S1.pdf]

|   | X         |           |           |           |           |           | 2         |           |           |           |           | 3         |           |           |           |   |
|---|-----------|-----------|-----------|-----------|-----------|-----------|-----------|-----------|-----------|-----------|-----------|-----------|-----------|-----------|-----------|---|
| A | TT        | GG        | GG        | AA        | AA        | TT        | CC        | CC        | AA        | CC        | AA        | CC        | GG        | GG        | TT        | M |
|   | TT        | GG        | GG        | AA        | AA        | TT        | CC        | CC        | AA        | CC        | AA        | CC        | GG        | GG        | TT        | S |
|   | TT        | GG        | GG        | GA        | AA        | TT        | CC        | TC        | AA        | CC        | AA        | TC        | GG        | GG        | TT        | H |
|   | GT        | AG        | TG        | GA        | TA        | CT        | AC        | TC        | GA        | TC        | GA        | TC        | GG        | GG        | TT        |   |
|   | GT        | AG        | TG        | GA        | TA        | CT        | AC        | TC        | GA        | TC        | GA        | TC        | AG        | AG        | CT        |   |
|   | GT        | AG        | TG        | GA        | TT        | CC        | AC        | TT        | AA        | CC        | AA        | CC        | GG        | GG        | TT        |   |
|   | GG        | AA        | TT        | GG        | TT        | CC        | AA        | TC        | GA        | TC        | GA        | TC        | GG        | GG        | TT        |   |
|   | GG        | AA        | TT        | GG        | TT        | CC        | AA        | TC        | GA        | TC        | GA        | TC        | AG        | AG        | CT        |   |
|   | GG        | AA        | TT        | GG        | TT        | CC        | AA        | TT        | GG        | TT        | GG        | TT        | AA        | AA        | CC        |   |
|   | 01076.129 | 01073.213 | 01073.073 | 01070.211 | 01061.488 | 01061.057 | 01039.358 | 04679.157 | 04691.107 | 04707.118 | 04707.247 | 04707.337 | 10313.052 | 10315.679 | 10317.546 |   |

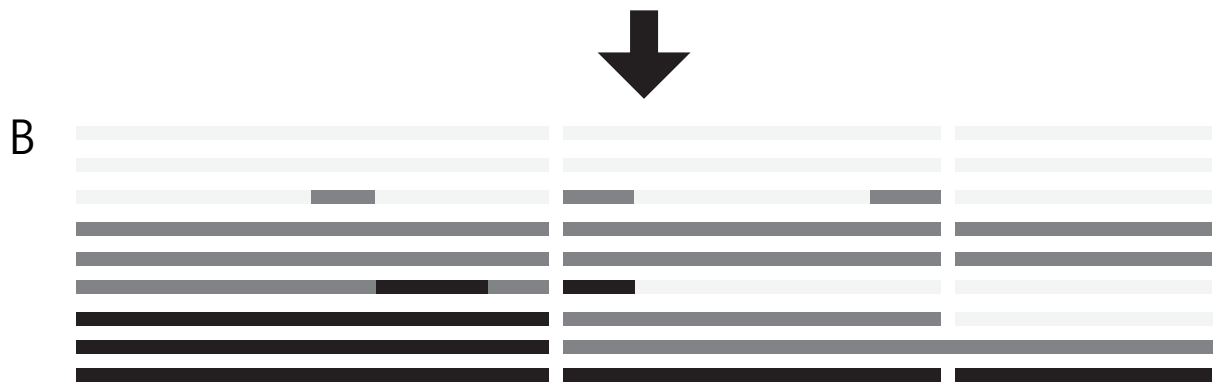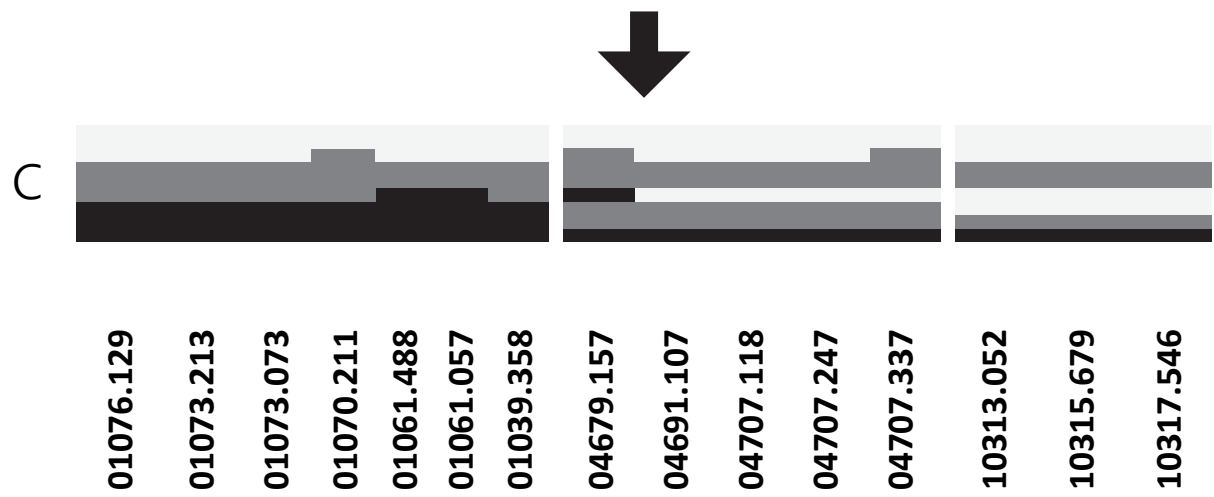

01076.129  
01073.213  
01073.073  
01070.211  
01061.488  
01061.057  
01039.358  
04679.157  
04691.107  
04707.118  
04707.247  
04707.337  
10313.052  
10315.679  
10317.546
